# Supplementary material
Source: Research Square preprint supplement (doi:10.21203/rs.3.rs-8400806/v1)
Supplement: Supplementary file 1 [file 4b73cc33907d1f3819292808.docx]

Supplementary Table S1. Resistance breakpoint of antimicrobial agents

| Antimicrobial  agent | Breakpoint (mg/mL) | | | | | |
| --- | --- | --- | --- | --- | --- | --- |
| *S. aureus* | CNS | *Corynebacterium* | *Streptococcus* | *C. acnes* | *Enterococcus* |
| Amoxicillin | 0.5 | 0.5 | N/A | 8 | 16 | N/A |
| Oxacillin | 4 | 0.5 | N/A | N/A | N/A | N/A |
| Cefdinir | 4 | 4 | N/A | 2 | 64 | N/A |
| Levofloxacin | 4 | 4 | N/A | 8 | 8 | 8 |
| Nadifloxacin | N/A | N/A | N/A | N/A | N/A | N/A |
| Roxythromycin | 8† | 8† | N/A | 1† | 2† | N/A |
| Clarithromycin | 8 | 8 | N/A | 1 | 2† | N/A |
| Clindamycin | 4 | 4 | 0.5 | 1 | 8 | N/A |
| Gentamicin | 16 | 16 | N/A | N/A | N/A | N/A |
| Tetracycline | 16 | 16 | 2 | 8 | N/A | 16 |
| Doxycycline | 16 | 16 | N/A | 1 | 16 | 16 |
| Minocycline | 16 | 16 | N/A | 1† | 16 | 16 |
| Metronidazole | N/A | N/A | N/A | N/A | N/A | N/A |
| DDS | N/A | N/A | N/A | N/A | N/A | N/A |
| Fusidic acid | 8† | 8† | N/A | N/A | 32 | N/A |
| Rifampicin | 4 | 4 | 0.5 | 4 | N/A | 4 |

†, Breakpoints were defined in this study.

N/A, break points were not defined by CLSI and EUCAST.

DDS, Diaminodiphenyl sulfone.
